# Supplementary material for: Fingerprint-based in silico models for the prediction of P-glycoprotein substrates and inhibitors
Source: PubMed Central journal article supplement — Bioorg Med Chem. 2012 Sep 15;20(18):5388–95. doi: 10.1016/j.bmc.2012.03.045 (PMC3445814; doi:10.1016/j.bmc.2012.03.045), 2012-09-15

# Fingerprint-based *in silico* models for the prediction of P-glycoprotein substrates and inhibitors

Poongavanam Vasanthanathan <sup>a</sup>, Norbert Haider <sup>b</sup>, and Gerhard F Ecker <sup>a, \*</sup>

<sup>a</sup>University of Vienna, Department of Medicinal Chemistry, Althanstrasse 14, 1090 Vienna, Austria

<sup>b</sup>University of Vienna, Department of Drug and Natural Product Synthesis, Althanstrasse 14, 1090 Vienna, Austria

## Supplementary material

- Tab.1: List of physicochemical properties used for PCA  
Tab.2: List of functional group contributed to the P-gp Substrate and Inhibitor models  
Tab.3: Summary of obtained models from substrates and inhibitor classification

Association rules provided in the separate excel sheet "[SM-FPGrowth-Rules.xlsx](#)"

Fig.1: Structures of Outliers, Gottesman et al., dataset (NSC170365, NSC237106, NSC237671, NSC3053, NSC356207, NSC356207, NSC38270, NSC695935) and Literature dataset (SDB-ethylenediamine, Cyclosporine-A, Cyclosporin-C, Olivomycin-A, Valinomycin).

Fig.2: **Distribution of LogP (O/W) of substrate and non-substrate.**

Fig.3: **Applicability domain experiment shown in PCA plot**

T1: List of physicochemical properties used for PCA

| Properties | Description                             |
|------------|-----------------------------------------|
| apol       | Sum of atomic polarizabilities          |
| a_acc      | Number of hydrogen bond acceptor atoms  |
| a_acid     | Number of acidic atoms                  |
| b_ar       | Number of aromatic bonds                |
| b_count    | Number of bonds                         |
| b_double   | Number of double bonds                  |
| b_heavy    | Number of heavy-heavy bonds             |
| LogP (o/w) | Log octanol/water partition coefficient |
| LogS       | Log of solubility in water              |
| MR         | Molar refractivity                      |
| Radius     | Smallest vertex eccentricity in graph   |
| Reactive   | Reactivity                              |
| Rings      | Number of rings                         |
| TPSA       | Topological polar surface area          |
| Weight     | Molecular weight                        |
| Zagreb     | Zagreb index                            |

T2: List of descriptors contributed to the P-gp Substrate and Inhibitor models

| Models                          | Functional groups         | Bin Number       |
|---------------------------------|---------------------------|------------------|
| Substrate/Non substrate         | Cation                    | 1                |
|                                 | Enol                      | 25               |
|                                 | Hydroxy compounds         | 27               |
|                                 | Alcohol                   | 28               |
|                                 | Primary Alcohol           | 29               |
|                                 | Secondary Alcohol         | 30               |
|                                 | 1, 2-Diol                 | 32               |
|                                 | Secondary Aliphatic Amine | 52               |
|                                 | Secondary Aromatic Amine  | 54               |
|                                 | Tertiary Aliphatic Amine  | 56               |
|                                 | Lactam                    | 84               |
|                                 | Carboxylic Acid Azides    | 86               |
|                                 | Nitrile                   | 90               |
|                                 | Inhibitor/Non-inhibitor   | Carbony Compound |
| Hydrazone                       |                           | 10               |
| Oxime Ether                     |                           | 14               |
| Acetal                          |                           | 19               |
| Hemiaminal                      |                           | 20               |
| Aminal                          |                           | 21               |
| Secondary Alcohol               |                           | 30               |
| 1, 2-Diol                       |                           | 32               |
| Phenol                          |                           | 34               |
| Alkyl Aryl ether                |                           | 39               |
| Amine                           |                           | 47               |
| Primary Amine                   |                           | 48               |
| Secondary Aliphatic Amine       |                           | 52               |
| Sec Alkyl Aryl Amine            |                           | 53               |
| Tertiary Aliphatic Amine        |                           | 56               |
| Carboxylic Acid                 |                           | 76               |
| Carboxylic Acid Ester           |                           | 78               |
| Carboxylic Acid Secondary Amide |                           | 82               |
| Lactam                          |                           | 84               |
| Thiocarboxylic Acid Ester       |                           | 101              |
| Iminohetarene                   |                           | 108              |
| Urea                            |                           | 133              |
| Thiourea                        |                           | 135              |
| Sulfonamide                     |                           | 164              |
| Aromatic compound               |                           | 201              |
| Heterocyclic Compound           |                           | 202              |

T3: Summary of obtained models from substrates and inhibitor classification

| Models     | No | Models | Dataset  | TP   | FN  | TN  | FP  | Sen. | Spec | NPP  | PPP  | G-mean | AUC  | F-Measure | BCR  | MCC  | Accuracy |      |
|------------|----|--------|----------|------|-----|-----|-----|------|------|------|------|--------|------|-----------|------|------|----------|------|
| Substrate  | 13 | KNN    | Training | 105  | 37  | 102 | 38  | 0.74 | 0.73 | 0.73 | 0.73 | 0.73   | 0.73 | 0.74      | 0.73 | 0.47 | 0.73     |      |
|            |    |        | Test     | 75   | 26  | 41  | 60  | 0.74 | 0.41 | 0.61 | 0.56 | 0.55   | 0.57 | 0.64      | 0.57 | 0.16 | 0.57     |      |
|            |    |        | 10-fold  | 188  | 55  | 167 | 74  | 0.77 | 0.69 | 0.75 | 0.72 | 0.73   | 0.73 | 0.74      | 0.73 | 0.47 | 0.73     |      |
|            |    | SVM    | Training | 91   | 51  | 104 | 36  | 0.64 | 0.74 | 0.67 | 0.72 | 0.69   | 0.69 | 0.69      | 0.68 | 0.69 | 0.39     | 0.69 |
|            |    |        | Test     | 67   | 34  | 57  | 44  | 0.66 | 0.56 | 0.63 | 0.60 | 0.61   | 0.61 | 0.61      | 0.63 | 0.61 | 0.23     | 0.61 |
|            |    |        | 10-fold  | 152  | 91  | 159 | 82  | 0.63 | 0.66 | 0.64 | 0.65 | 0.64   | 0.64 | 0.64      | 0.64 | 0.64 | 0.29     | 0.64 |
|            |    | RF     | Training | 106  | 36  | 120 | 20  | 0.75 | 0.86 | 0.77 | 0.84 | 0.80   | 0.80 | 0.80      | 0.79 | 0.80 | 0.61     | 0.80 |
|            |    |        | Test     | 73   | 28  | 69  | 32  | 0.72 | 0.68 | 0.71 | 0.70 | 0.70   | 0.70 | 0.70      | 0.71 | 0.70 | 0.41     | 0.70 |
|            |    |        | 10-fold  | 179  | 64  | 182 | 59  | 0.74 | 0.76 | 0.74 | 0.75 | 0.75   | 0.75 | 0.75      | 0.74 | 0.75 | 0.49     | 0.75 |
| Inhibitors | 26 | KNN    | Training | 825  | 56  | 230 | 157 | 0.94 | 0.59 | 0.80 | 0.84 | 0.75   | 0.77 | 0.89      | 0.77 | 0.58 | 0.83     |      |
|            |    |        | Test     | 345  | 54  | 142 | 126 | 0.86 | 0.53 | 0.72 | 0.73 | 0.68   | 0.70 | 0.79      | 0.70 | 0.42 | 0.73     |      |
|            |    |        | 10-fold  | 1153 | 127 | 378 | 277 | 0.90 | 0.58 | 0.75 | 0.81 | 0.72   | 0.74 | 0.85      | 0.74 | 0.51 | 0.79     |      |
|            |    | SVM    | Training | 800  | 81  | 190 | 197 | 0.91 | 0.49 | 0.70 | 0.80 | 0.67   | 0.70 | 0.85      | 0.70 | 0.45 | 0.78     |      |
|            |    |        | Test     | 345  | 54  | 129 | 139 | 0.86 | 0.48 | 0.70 | 0.71 | 0.65   | 0.67 | 0.78      | 0.67 | 0.38 | 0.71     |      |
|            |    |        | 10-fold  | 1153 | 127 | 307 | 348 | 0.90 | 0.47 | 0.71 | 0.77 | 0.65   | 0.68 | 0.83      | 0.68 | 0.42 | 0.75     |      |
|            |    | RF     | Training | 845  | 36  | 289 | 98  | 0.96 | 0.75 | 0.89 | 0.90 | 0.85   | 0.85 | 0.93      | 0.85 | 0.74 | 0.89     |      |
|            |    |        | Test     | 334  | 65  | 168 | 100 | 0.84 | 0.63 | 0.72 | 0.77 | 0.72   | 0.73 | 0.80      | 0.73 | 0.48 | 0.75     |      |
|            |    |        | 10-fold  | 1148 | 132 | 426 | 229 | 0.90 | 0.65 | 0.76 | 0.83 | 0.76   | 0.77 | 0.86      | 0.77 | 0.57 | 0.81     |      |

Abbreviations: No: Number of descriptors used for models, KNN: Kappa nearest neighbor, SVM: Support vector machine, RF: Random forest, TP: True positive, TN: True negative, FP: False positive, FN: False negative, Sen.: sensitivity, Spec.: Specificity, NPP: Negative predictive power, PPP: Positive predictive power, AUC: Area under curve, BCR: Balanced classification rate, MCC: Matthews correlation coefficient, 10-fold: 10-fold cross validation of whole dataset.

F1: Structures of Outliers, First eight compounds (NSC170365, NSC237106, NSC237671, NSC3053, NSC356207, NSC356207, NSC38270, NSC695935) were present in Szakács et al., dataset and last five compounds (SDB-ethylenediamine, Cyclosporine-A, Cyclosporin-C, Olivomycin-A, Valinomycin) were present in Literature dataset.

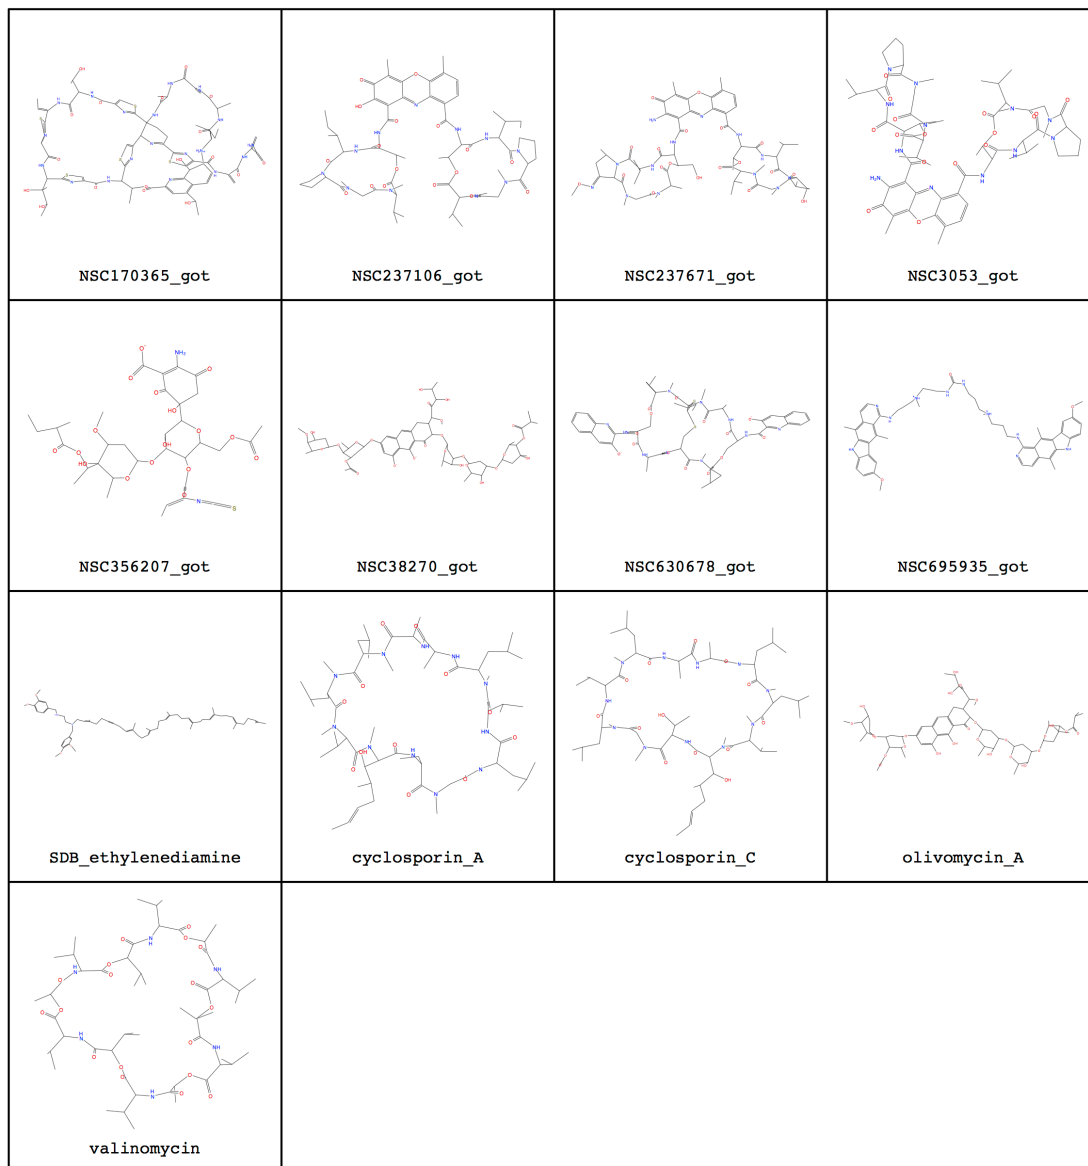

F2: Distribution of LogP (O/W) of substrate and non-substrate.

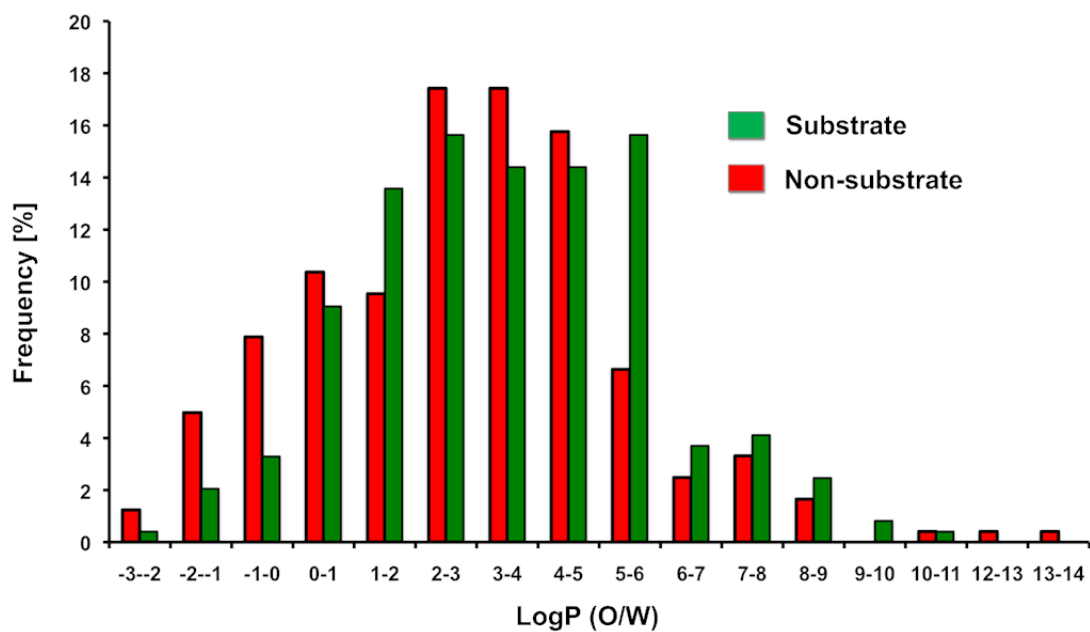

Fig.3: Applicability domain experiment shown in PCA plot

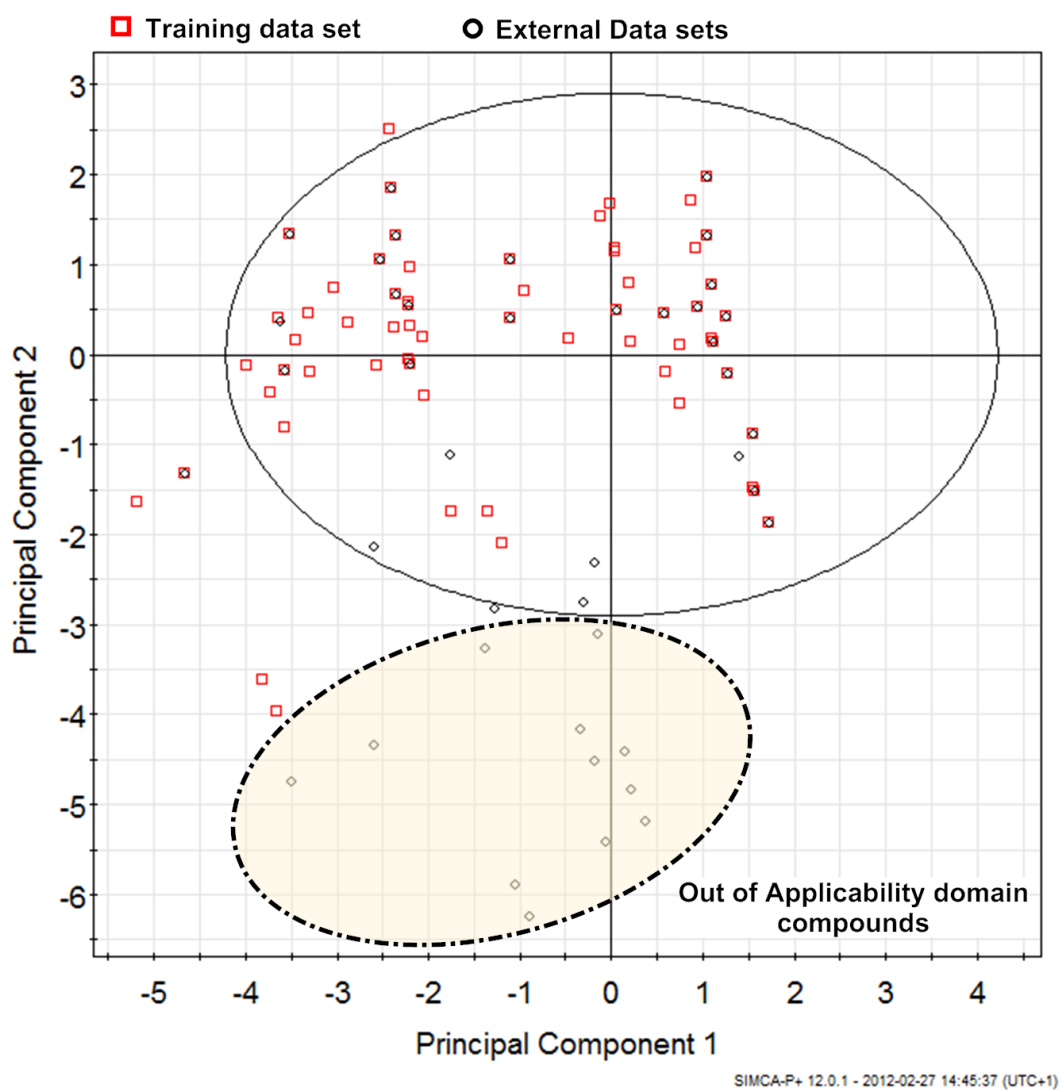

Supplement: mmc1.pdf [file mmc1.pdf]
